# Supplementary material for: Molecular and Technological Characterization ofSaccharomyces cerevisiaeStrains Isolated from Natural Fermentation of Susumaniello Grape Must in Apulia, Southern Italy
Source: Hindawi journal article supplement (doi:10.1155/2014/897428), 2014-01-01
Supplement: f1 [file 897428.f1.pdf]

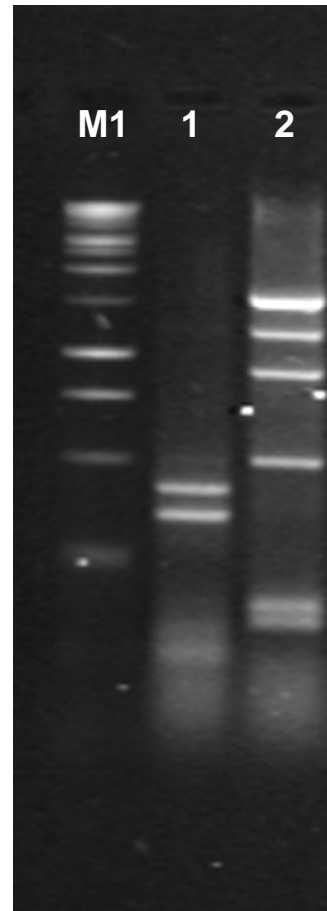

FIG. 1 – Electrophoretic patterns of interdelta region obtained from the CM (lane 1) and an unrelated *S. cerevisiae* (lane 2) strains. M1, 1Kb DNA Ladder (New England Biolabs, USA).
